# Supplementary material for: Comparability of modified and standardized test conditions for the 6-minute run
Source: Research Square preprint supplement (doi:10.21203/rs.3.rs-6164588/v1), 2025-09-26
Supplement: Supplementary file 1 [file 1211ba92f1b8222109194125.docx]

**Comparability of modified and standardized test conditions for the 6-minute run**

**Supplementary material**

Gerald Jarnig, Reinhold Kerbl, Christoph Rottensteiner, Mireille N.M. van Poppel

This supplementary material has been provided by the authors to give readers additional information about their work.

**Content**

**Table S1.** Additional sample characteristics and descriptive data of analyzed parameters for the subgroup age group, by sex

**Table S2.** Mixed ANOVAS for BMI and starting heart rate data over measurement time points T1-6MR-9×18, T2-6MR-9×6 und T3-6MR-400.

**Table S3.** Post hoc tests of heart rate and cardiorespiratory endurance data for the main effect of time and interactions for time*sex and time*age group based on estimated marginal means.

**Table S1.** Additional sample characteristics and descriptive data of analyzed parameters for the subgroup age group, by sex

|  | **Girls** | | | | | | **Boys** | | | | | |
| --- | --- | --- | --- | --- | --- | --- | --- | --- | --- | --- | --- | --- |
| **AG1** | | | **AG2** | | | **AG1** | | | **AG2** | | |
| **T1 - 9×18** | **T2 - 9×6** | **T3 - 400** | **T1 - 9×18** | **T2 - 9×6** | **T3 - 400** | **T1 - 9×18** | **T2 - 9×6** | **T3 - 400** | **T1 - 9×18** | **T2 - 9×6** | **T3 - 400** |
| **N** | 16 | | | 10 | | | 37 | | | 34 | | |
| **Age. years** | 12.0 ± 0.6 | 12.0 ± 0.6 | 12.0 ± 0.6 | 13.8 ± 0.7 | 13.8 ± 0.7 | 13.8 ± 0.7 | 11.8 ± 0.7 | 11.8 ± 0.7 | 11.9 ± 0.7 | 14.0 ± 0.6 | 14.0 ± 0.6 | 14.0 ± 0.6 |
| **Weight. kg** | 42.1 ± 8.4 | 42.4 ± 8.5 | 42.7 ± 8.2 | 45.0 ± 9.4 | 44.7 ± 9.3 | 44.9 ± 9.5 | 40.5 ± 7.0 | 40.5 ± 6.5 | 40.8 ± 7.1 | 53.9 ± 8.1 | 54.9 ± 8.0 | 54.3 ± 8.2 |
| **Height. cm** | 152.9 ± 9.6 | 152.9 ± 9.6 | 152.9 ± 9.6 | 158.6 ± 7.3 | 158.6 ± 7.3 | 158.6 ± 7.3 | 151.5 ± 7.7 | 151.5 ± 7.7 | 151.5 ± 7.7 | 166.4 ± 7.3 | 166.4 ± 7.3 | 166.4 ± 7.3 |
| **BMI. kg/m2** | 17.9 ± 2.2 | 18.0 ± 2.2 | 18.1 ± 2.1 | 17.7 ± 2.4 | 17.6 ± 2.4 | 17.7 ± 2.5 | 17.6 ± 2.0 | 17.6 ± 1.9 | 17.7 ± 2.1 | 19.4 ± 2.0 | 19.8 ± 2.5 | 19.5 ± 2.0 |
| **6MR. m** | 1226 ± 94 | 1224 ± 100 | 1289 ± 99 | 1268 ± 92 | 1256 ± 104 | 1349 ± 123 | 1291 ± 78 | 1277 ± 82 | 1330 ± 112 | 1339 ± 96 | 1364 ± 82 | 1436 ± 120 |
| **SHR. bpm** | 117.9 ± 19.0 | 110.4 ± 19.4 | 123.6 ± 20.8 | 115.1 ± 14.2 | 118.3 ± 14.7 | 120.7 ± 15.4 | 109.3 ± 15.5 | 110.4 ± 13.0 | 122.5 ± 20.2 | 108.0 ± 18.8 | 100.6 ± 21.8 | 122.6 ± 18.8 |
| **AHR. bpm** | 188.1 ± 9.9 | 189.1 ± 8.7 | 191.8 ± 8.3 | 181.4 ± 12.1 | 184.8 ± 8.1 | 189.3 ± 8.6 | 184.3 ± 12.0 | 184.8 ± 10.1 | 189.4 ± 10.5 | 184.9 ± 9.0 | 184.8 ± 8.3 | 186.6 ± 10.4 |
| **MHR. bpm** | 201.2 ± 7.9 | 200.5 ± 8.3 | 200.7 ± 9.3 | 199.7 ± 6.9 | 197.2 ± 7.0 | 199.1 ± 7.5 | 198.3 ± 7.0 | 198.3 ± 6.5 | 199.2 ± 7.3 | 196.9 ± 7.3 | 195.7 ± 7.6 | 198.4 ± 7.2 |
| **6MRz-value (BÖS). mean (SD)** | 1.68 ± 0.77 | 1.66 ± 0.81 | 2.14 ± 0.79 | 1.92 ± 0.66 | 1.83 ± 0.76 | 2.50 ± 0.89 | 1.31 ± 0.48 | 1.20 ± 0.51 | 1.55 ± 0.68 | 0.88 ± 0.55 | 1.03 ± 0.49 | 1.46 ± 0.74 |
| **BMIIOTF SDS** | - 0.04 ± 0.76 | 0.00 ± 0.73 | 0.06 ± 0.69 | - 0.66 ± 1.03 | - 0.70 ± 1.00 | - 0.67 ± 1.02 | - 0.01 ± 0.82 | 0.02 ± 0.76 | 0.04 ± 0.81 | 0.24 ± 0.81 | 0.35 ± 0.88 | 0.29 ± 0.78 |

Sample size for study population, N = 97; Data are No. or mean (SD). N = Number, SD = standard deviation, m = meters; AG = age group, kg = kilogram, cm = centimeter, BMI = body mass index, m2 = square meter, AHR = average heart rate, MHR = maximal heart rate, 6MR = 6 Minutes run, bpm = beats per minute, SDS = standard deviation score, BMIIOTF SDS = BMI SDS based on International Obesity Taskforce reference centile curves, z-value = traditional z-score standardization; T1= test procedure on a standard rectangular field with dimensions of 9 meters × 18 meters, T2 = test procedure on a reduced rectangular field with dimensions of 9 meters × 6 meters, T3 = test procedure on an increased elliptical field with a path length of 400 meters.

**Table S2.** Mixed ANOVAS for BMI and starting heart rate data over measurement time points T1-6MR-9×18, T2-6MR-9×6 und T3-6MR-400.

| **Variable** | | **Effects** | **df** | **F** | ***P* Value** | **ηp2** | **Power a** |
| --- | --- | --- | --- | --- | --- | --- | --- |
| **BMI. kg/m2** | Between-subjects effects | Sex | 1 | 2.358 | .13 | 0.025 | 0.330 |
| Age Groups | 1 | 2.825 | .10 | 0.029 | 0.384 |
| Sex*Age Groups | 1 | 5.572 | .020 | 0.057 | 0.647 |
| Error | 93 |  |  |  |  |
| Within-subjects effects | Time (T1-T2-T3) | 1.072 | 0.847 | .37 | 0.009 | 0.153 |
| Time*Sex | 1.072 | 0.685 | .42 | 0.007 | 0.133 |
| Time*Age Groups | 1.072 | 0.564 | .47 | 0.006 | 0.118 |
| Time*Sex*Age Groups | 1.072 | 1.051 | .31 | 0.011 | 0.178 |
| Error (Time) | 99.719 |  |  |  |  |
| **SHR. bpm** | Between-subjects effects | Sex | 1 | 2.695 | .10 | 0.028 | 0.369 |
| Age Groups | 1 | 0.195 | .66 | 0.002 | 0.072 |
| Sex*Age Groups | 1 | 0.435 | .51 | 0.005 | 0.100 |
| Error | 93 |  |  |  |  |
| Within-subjects effects | Time (T1-T2-T3) | 2 | 16.336 | <.001 | 0.149 | 1.000 |
| Time*Sex | 2 | 2.464 | .09 | 0.026 | 0.491 |
| Time*Age Groups | 2 | 0.027 | .97 | 0.000 | 0.054 |
| Time*Sex*Age Groups | 2 | 3.157 | .045 | 0.033 | 0.600 |
| Error (Time) | 186 |  |  |  |  |
| **BMIIOTF SDS** | Between-subjects effects | Sex | 1 | 6.745 | .011 | 0.068 | 0.729 |
| Age Groups | 1 | 1.178 | .28 | 0.013 | 0.189 |
| Sex*Age Groups | 1 | 6.367 | .013 | 0.064 | 0.704 |
| Error | 93 |  |  |  |  |
| Within-subjects effects | Time (T1-T2-T3) | 1.190 | 1.357 | .25 | 0.014 | 0.227 |
| Time*Sex | 1.190 | 0.794 | .40 | 0.008 | 0.151 |
| Time*Age Groups | 1.190 | 0.567 | .48 | 0.006 | 0.121 |
| Time*Sex*Age Groups | 1.190 | 1.095 | .31 | 0.012 | 0.192 |
| Error (Time) | 110.663 |  |  |  |  |

a observed power computed using alpha = .05

ANOVA = analysis of variance, m = meters, kg = kilogram, BMI = body mass index, m2 = square meter, SHR = starting heart rate, bpm = beats per minute, SDS = standard deviation score, BMIIOTF SDS = BMI SDS based on International Obesity Taskforce reference centile curves, z-value = traditional z-score standardization, T1= test procedure on a standard rectangular field with dimensions of 9 meters × 18 meters, T2 = test procedure on a reduced rectangular field with dimensions of 9 meters × 6 meters, T3 = test procedure on an increased elliptical field with a path length of 400 meters; df = degrees of freedom, F = test statistic, = partial eta square.

**Table S3.** Post hoc tests of heart rate and cardiorespiratory endurance data for the main effect of time and interactions for time*sex and time*age group based on estimated marginal means.

| **Variable** | **Subgroups** | **Pairwise comparisons** | **Mean diff (95% CI)** | | | | | | **SE** | **p-lvl** | ***P* Valuea** |
| --- | --- | --- | --- | --- | --- | --- | --- | --- | --- | --- | --- |
| **6MR, m** | Time | T1 to T2 | 0.687 | ( | -10.79 | to | 12.164 | ) | 4.708 |  | >.99 |
| T1 to T3 | -70,011* | ( | -93.073 | to | -46.949 | ) | 9.459 | *** | <.001 |
| T2 to T3 | -70,698* | ( | -93.196 | to | -48.201 | ) | 9.228 | *** | <.001 |
| Time*Sex (Girls) | T1 to T2 | 7.223 | ( | -17.158 | to | 31.604 | ) | 9.473 |  | >.99 |
| T1 to T3 | -71,803* | ( | -113.702 | to | -29.905 | ) | 16.28 | ** | 0.001 |
| T2 to T3 | -79,026* | ( | -119.31 | to | -38.742 | ) | 15.653 | *** | <.001 |
| Time*Sex (Boys) | T1 to T2 | -5.849 | ( | -16.81 | to | 5.113 | ) | 4.467 |  | 0.58 |
| T1 to T3 | -68,219* | ( | -91.798 | to | -44.641 | ) | 9.609 | *** | <.001 |
| T2 to T3 | -62,371* | ( | -85.486 | to | -39.255 | ) | 9.42 | *** | <.001 |
| Time*Age Group 1 | T1 to T2 | 8.154 | ( | -6.694 | to | 23.003 | ) | 5.998 |  | 0.54 |
| T1 to T3 | -51,217* | ( | -72.915 | to | -29.518 | ) | 8.765 | *** | <.001 |
| T2 to T3 | -59,371* | ( | -82.148 | to | -36.594 | ) | 9.201 | *** | <.001 |
| Time*Age Group 2 | T1 to T2 | -6.78 | ( | -24.911 | to | 11.351 | ) | 7.271 |  | >.99 |
| T1 to T3 | -88,806* | ( | -134.351 | to | -43.261 | ) | 18.264 | *** | <.001 |
| T2 to T3 | -82,026* | ( | -125.016 | to | -39.036 | ) | 17.24 | *** | <.001 |
| **6MRz-value (BÖS), mean (SD)** | Time | T1 to T2 | 0.012 | ( | -0.063 | to | 0.088 | ) | 0.031 |  | >.99 |
| T1 to T3 | -,468* | ( | -0.618 | to | -0.318 | ) | 0.062 | *** | <.001 |
| T2 to T3 | -,480* | ( | -0.627 | to | -0.333 | ) | 0.06 | *** | <.001 |
| Time*Sex (Girls) | T1 to T2 | 0.052 | ( | -0.125 | to | 0.229 | ) | 0.069 |  | >.99 |
| T1 to T3 | -,522* | ( | -0.825 | to | -0.218 | ) | 0.118 |  | 0.001 |
| T2 to T3 | -,574* | ( | -0.865 | to | -0.282 | ) | 0.113 | *** | <.001 |
| Time*Sex (Boys) | T1 to T2 | -0.028 | ( | -0.095 | to | 0.04 | ) | 0.028 |  | 0.95 |
| T1 to T3 | -,414* | ( | -0.561 | to | -0.267 | ) | 0.06 | *** | <.001 |
| T2 to T3 | -,386* | ( | -0.531 | to | -0.242 | ) | 0.059 | *** | <.001 |
| Time*Age Group 1 | T1 to T2 | 0.059 | ( | -0.039 | to | 0.157 | ) | 0.04 |  | 0.43 |
| T1 to T3 | -,354* | ( | -0.498 | to | -0.21 | ) | 0.058 | *** | <.001 |
| T2 to T3 | -,413* | ( | -0.565 | to | -0.26 | ) | 0.062 | *** | <.001 |
| Time*Age Group 2 | T1 to T2 | -0.034 | ( | -0.153 | to | 0.084 | ) | 0.048 |  | >.99 |
| T1 to T3 | -,582* | ( | -0.875 | to | -0.288 | ) | 0.118 | *** | <.001 |
| T2 to T3 | -,547* | ( | -0.824 | to | -0.271 | ) | 0.111 | *** | <.001 |
| **SHR, bpm** | Time | T1 to T2 | 2.635 | ( | -2.848 | to | 8.118 | ) | 2.249 |  | 0.73 |
| T1 to T3 | -9,803* | ( | -15.218 | to | -4.387 | ) | 2.221 | *** | <.001 |
| T2 to T3 | -12,438* | ( | -18.302 | to | -6.574 | ) | 2.405 | *** | <.001 |
| Time*Sex (Girls) | T1 to T2 | 2.119 | ( | -8.803 | to | 13.041 | ) | 4.244 |  | >.99 |
| T1 to T3 | -5.675 | ( | -14.088 | to | 2.738 | ) | 3.269 |  | 0.29 |
| T2 to T3 | -7.794 | ( | -19.239 | to | 3.651 | ) | 4.447 |  | 0.28 |
| Time*Sex (Boys) | T1 to T2 | 3.152 | ( | -2.254 | to | 8.557 | ) | 2.203 |  | 0.47 |
| T1 to T3 | -13,930* | ( | -19.72 | to | -8.141 | ) | 2.359 | *** | <.001 |
| T2 to T3 | -17,082* | ( | -22.916 | to | -11.249 | ) | 2.377 | *** | <.001 |
| Time*Age Group 1 | T1 to T2 | 3.165 | ( | -4.076 | to | 10.406 | ) | 2.925 |  | 0.85 |
| T1 to T3 | -9,497* | ( | -17.056 | to | -1.937 | ) | 3.054 | ** | 0.009 |
| T2 to T3 | -12,661* | ( | -20.684 | to | -4.639 | ) | 3.241 | ** | 0.001 |
| Time*Age Group 2 | T1 to T2 | 2.106 | ( | -6.336 | to | 10.548 | ) | 3.385 |  | >.99 |
| T1 to T3 | -10,109* | ( | -17.781 | to | -2.437 | ) | 3.077 | ** | 0.006 |
| T2 to T3 | -12,215* | ( | -20.8 | to | -3.629 | ) | 3.443 | ** | 0.003 |
| **AHR, bpm** | Time | T1 to T2 | -1.185 | ( | -3.129 | to | 0.759 | ) | 0.797 |  | 0.42 |
| T1 to T3 | -4,577* | ( | -7.12 | to | -2.035 | ) | 1.043 | *** | <.001 |
| T2 to T3 | -3,392* | ( | -5.471 | to | -1.313 | ) | 0.853 | *** | <.001 |
| Time*Sex (Girls) | T1 to T2 | -2.2 | ( | -6.752 | to | 2.352 | ) | 1.769 |  | 0.68 |
| T1 to T3 | -5,763* | ( | -10.501 | to | -1.024 | ) | 1.841 | * | 0.014 |
| T2 to T3 | -3.563 | ( | -7.276 | to | 0.151 | ) | 1.443 |  | 0.06 |
| Time*Sex (Boys) | T1 to T2 | -0.171 | ( | -1.916 | to | 1.574 | ) | 0.711 |  | >.99 |
| T1 to T3 | -3,392* | ( | -5.968 | to | -0.817 | ) | 1.05 | ** | 0.006 |
| T2 to T3 | -3,221* | ( | -5.359 | to | -1.084 | ) | 0.871 | ** | 0.001 |
| Time*Age Group 1 | T1 to T2 | -0.73 | ( | -3.003 | to | 1.543 | ) | 0.918 |  | >.99 |
| T1 to T3 | -4,367* | ( | -7.477 | to | -1.256 | ) | 1.256 | ** | 0.003 |
| T2 to T3 | -3,637* | ( | -5.864 | to | -1.41 | ) | 0.9 | ** | 0.001 |
| Time*Age Group 2 | T1 to T2 | -1.641 | ( | -5.032 | to | 1.749 | ) | 1.36 |  | 0.7 |
| T1 to T3 | -4,788* | ( | -9.05 | to | -0.526 | ) | 1.709 | * | 0.023 |
| T2 to T3 | -3.147 | ( | -6.999 | to | 0.705 | ) | 1.545 |  | 0.14 |
| **MHR, bpm** | Time | T1 to T2 | 1.098 | ( | -0.392 | to | 2.589 | ) | 0.611 |  | 0.23 |
| T1 to T3 | -0.302 | ( | -1.743 | to | 1.14 | ) | 0.591 |  | >.99 |
| T2 to T3 | -1.4 | ( | -2.866 | to | 0.066 | ) | 0.601 |  | 0.07 |
| Time*Sex (Girls) | T1 to T2 | 1.594 | ( | -0.774 | to | 3.961 | ) | 0.92 |  | 0.29 |
| T1 to T3 | 0.55 | ( | -2.04 | to | 3.14 | ) | 1.006 |  | >.99 |
| T2 to T3 | -1.044 | ( | -3.958 | to | 1.87 | ) | 1.132 |  | >.99 |
| Time*Sex (Boys) | T1 to T2 | 0.603 | ( | -0.982 | to | 2.188 | ) | 0.646 |  | >.99 |
| T1 to T3 | -1.153 | ( | -2.633 | to | 0.327 | ) | 0.603 |  | 0.18 |
| T2 to T3 | -1,756* | ( | -3.203 | to | -0.309 | ) | 0.59 | * | 0.012 |
| Time*Age Group 1 | T1 to T2 | 0.344 | ( | -1.271 | to | 1.958 | ) | 0.652 |  | >.99 |
| T1 to T3 | -0.182 | ( | -2.23 | to | 1.865 | ) | 0.827 |  | >.99 |
| T2 to T3 | -0.526 | ( | -2.307 | to | 1.254 | ) | 0.719 |  | >.99 |
| Time*Age Group 2 | T1 to T2 | 1.853 | ( | -0.889 | to | 4.595 | ) | 1.1 |  | 0.3 |
| T1 to T3 | -0.421 | ( | -2.401 | to | 1.56 | ) | 0.794 |  | >.99 |
| T2 to T3 | -2.274 | ( | -4.748 | to | 0.201 | ) | 0.992 |  | 0.08 |

a Adjusted for multiple comparisons using Bonferroni correction. *p*-lvl (*p*-value level) = ** *p* < 0.01, and *** *p* < 0.001; CI = confidence interval; Mean Difference = mean difference based on the estimated marginal means; *p*-lvl = significance level; SE = standard error; SHR = starting heart rate, AHR = average heart rate, MHR = maximal heart rate, 6MR = 6 Minutes run, bpm = beats per minute, df = degrees of freedom, F = test statistic, = partial eta square, SD = standard deviation, z-value = traditional z-score standardization, T1= test procedure on a standard rectangular field with dimensions of 9 meters × 18 meters, T2 = test procedure on a reduced rectangular field with dimensions of 9 meters × 6 meters, T3 = test procedure on an increased elliptical field with a path length of 400 meters, m = meters.
